# Supplementary material for: Intrasexual cuticular hydrocarbon dimorphism in a wasp sheds light on hydrocarbon biosynthesis genes in Hymenoptera
Source: PubMed Central journal article supplement (PMC9898505; doi:10.1038/s42003-022-04370-0), 2023-02-03
Supplement: 42003_2022_4370_MOESM2_ESM.pdf [file 42003_2022_4370_MOESM2_ESM.pdf]

## Description of Additional Supplementary Files

**File name:** Supplementary Data 1

**Description:** *Odynerus spinipes* genes significantly differentially expressed in batch 1-females with different chemotype. The table shows the gene IDs, the log<sub>2</sub>-fold change values (values < 0 indicate higher expression of genes in females with chemotype 2 than in females with chemotype 1), the p-value obtained with DESeq2, the adjusted p-value from applying the false discovery rate (FDR), and the predicted function of the genes based on homology.

**File name:** Supplementary Data 2

**Description:** *Odynerus spinipes* genes significantly differentially expressed in batch 2-females with different chemotype. The table shows the gene IDs, the log<sub>2</sub>-fold change values (values < 0 indicate higher expression of genes in females with chemotype 2 than in females with chemotype 1), the p-value obtained with DESeq2, the adjusted p-value from applying the false discovery rate (FDR), and the predicted function of the genes based on homology.
