# Supplementary material for: Intrasexual cuticular hydrocarbon dimorphism in a wasp sheds light on hydrocarbon biosynthesis genes in Hymenoptera
Source: PubMed Central journal article supplement (PMC9898505; doi:10.1038/s42003-022-04370-0), 2023-02-03
Supplement: 42003_2022_4370_MOESM3_ESM.pdf [file 42003_2022_4370_MOESM3_ESM.pdf]

## 1 **Supplementary Methods**

2

### 3 *Trap nests*

4

5 *Odynerus spinipes* trap nests consisted of 20 cm long plastic pipes with a clear diameter  
6 of 10 cm filled with eolian silt deposit. The eolian silt deposit contained pre-built 7 cm  
7 long channels with a diameter of 0.6 cm each. The trap nests were mounted on posts at  
8 a height between 5 and 100 cm from the ground in Büchelberg, Germany (49.027985,  
9 8.164801) in February 2015. The prepupae were removed from the trap nests in March  
10 2016 and stored in separate transparent gelatin capsules (empty hard gelatin capsules  
11 size 3, LUTOR trading & distribution, Cologne, Deutschland and Birmingham, United  
12 Kingdom). Each gelatin capsule was pierced with an insect needle to improve gas  
13 exchange. The prepupae were stored at 4 °C within a box containing a wet tissue  
14 (changed every two days). Synchronized development was triggered end of April 2016  
15 by increasing the ambient temperature to 23 °C. This resulted in most males hatching  
16 one week and most females hatching two weeks later.

17 *O. spinipes* females used for transcriptome sequencing were collected from trap nests  
18 placed in Bad Muskau (51.548200, 14.714900; in 2017), Büchelberg (49.027985,  
19 8.164801; in 2015 and 2017), and Eichenzell (50.495927, 9.704589; in 2016), and  
20 treated as described above.

21

22 *Gas chromatography and mass spectrometry*

23

24 CHC extracts of *Odynerus spinipes* samples kept in the laboratory (from Büchelberg  
25 [2015 and 2016] and from Eichenzell [2016]) as well as of the three wasps sampled at  
26 the field site Büchelberg in 2016 were processed with an Agilent 6890 gas  
27 chromatograph (GC) coupled to an Agilent 5975 mass selective detector (MS, Agilent  
28 Technologies, Waldbronn, Germany). The GC was operated in splitless injection mode  
29 and fitted with a DB-5 Fused Silica capillary column (30 m × 0.25 mm ID; film thickness:  
30 0.25 µm; J&W Scientific, Folsom, United States). CHC extracts of wasps sampled in  
31 2017 in the field at the field site Büchelberg were processed with HP series 6890 gas  
32 chromatograph (Hewlett Packard, Palo Alto, California, USA), equipped with a DB-5  
33 column (30 m x 0.25 mm film thickness: 0.25 µm; J&W Scientific, Folsom,  
34 USA), coupled to a HP series 5973 quadrupole mass spectrometer (Hewlett Packard,  
35 Palo Alto, California). CHC extracts of wasps studied at the field site Tenneville in 2017  
36 were analyzed with a gas chromatograph-flame ionization detector (Shimadzu GC-2010  
37 system, Shimadzu, Wommel, Belgium) equipped with a SLB-5 MS non-polar capillary  
38 column (5%-phenyl)-methylpolysiloxane stationary phase; 30 m × 0.25 mm ID; film  
39 thickness: 0.25 µm). We consistently applied the following temperature profile when  
40 analyzing CHC extracts of wasps: start temperature 60 °C, temperature increase of 20  
41 °C per minute up to 150 °C, followed by a temperature increase of 5 °C per minute up to  
42 300 °C, which was maintained for 10 min. Honey bee CHC extracts were analyzed with  
43 the Agilent GC-MS specified above and applying the following temperature profile: start

44 temperature 60 °C, followed by a temperature increase of 5 °C per minute up to 300 °C,  
45 which was maintained for 10 min.

46

#### 47 *Genomic DNA NGS libraries*

48

49 We generated three genomic DNA NGS libraries from a single pool of DNA extracted  
50 from meso- and metasomas of ten males (collected May 15 and 16, 2013) and 31  
51 females (unidentified chemotypes, collected May 15 and 16, 2013) of *Odynerus spinipes*  
52 collected near Würzburg, Germany (49.77977, 9.97065) (voucher samples of the female  
53 samples are available in the BioBank of Oliver Niehuis at the University of Freiburg:  
54 ON\_0890–0899, ON\_0923, ON\_0924, ON\_2277–ON\_2295).

55

#### 56 *Raw read processing*

57

58 All raw reads of genomic DNA were processed with trimmomatic<sup>1</sup> version 0.33, selecting  
59 paired-end mode (if applicable), the Illumina TruSeq3 adapter sequences provided with  
60 trimmomatic, and the parameters: LEADING:3, TRAILING:3, SLIDINGWINDOW: 4:25,  
61 MINLEN:50. The RNA-seq raw reads were processed with the same software.

62

#### 63 *Masking of transposable elements and annotation of protein-coding genes*

64

65 We used RepeatModeler version 1.0.8 (<http://www.repeatmasker.org>) to compile a *de*  
66 *novo* repeat library. The pipeline identifies transposon (TE) nucleotide sequences by

67 comparing the *de novo* repeat library to entries in the NCBI nr database (downloaded  
68 03/17/2016 from <https://ftp.ncbi.nlm.nih.gov/blast/db/>) and removing nucleotide  
69 sequences that are not associated with transposons. We applied the same filter  
70 parameters as used by Petersen et al.<sup>2</sup>. The pipeline further combines the filtered repeat  
71 library with the Metazoa-specific section of RepBase<sup>3</sup> version 20140131 to create the  
72 final repeat library. RepeatMasker<sup>4</sup> version 4.0.5 was then used to annotate TEs in the  
73 *O. spinipes* genome assembly and to generate a soft-masked version of the draft  
74 genome. Protein-coding genes were annotated with the BRAKER<sup>5</sup> *ab initio* gene  
75 prediction pipeline version 2.1. To this end, we first mapped the available trimmed RNA-  
76 seq raw reads onto the soft-masked version of the *O. spinipes* draft genome assembly  
77 using HISAT2<sup>6,7</sup> version 2.1.0 and converted the output into a sorted BAM file using  
78 SAMtools<sup>8</sup> version 1.7 and BAMtools<sup>9</sup> version 2.3.0. The resulting BAM file was,  
79 together with the soft-masked draft genome assembly, provided as input to the  
80 BRAKER2 pipeline (internally using GeneMark<sup>10</sup> version 4.33; Augustus<sup>11</sup> version 3.3;  
81 NCBI BLAST+<sup>12,13</sup> version 2.6.0; SAMtools<sup>8</sup> version 1.7; and BAMtools<sup>9</sup> version 2.5.1) to  
82 predict protein-coding genes. BRAKER2 parameters (apart from path specifications)  
83 were set as follows: --UTR=off --gff3 --softmasking. UTR annotation was disabled, as it  
84 was at the time of execution according to the documentation of Augustus 3.3 not  
85 suitable for annotation of non-model insect genomes.

86

87 *Gene tree taxon sampling*

88

89 We searched the proteomes of the following 36 Euarthropoda for genes/proteins of gene  
90 families of interest: *Acromyrmex echinator* (OGS version 3.8<sup>14</sup>), *Aedes aegypti* (gene  
91 set version AaegL3.3<sup>15</sup>), *Amyelois transitella* (gene set version 1; NCBI  
92 GCA\_001186105.1), *Apis mellifera* (OGS version 3.2<sup>16</sup>), *Bombus terrestris* (gene set  
93 version 1.0<sup>17</sup>), *Bombyx mori* (gene set version 1.0<sup>18</sup>), *Calopteryx splendens* (OGS  
94 version 1.0<sup>19</sup>), *Camponotus floridanus* (gene set version 3.3<sup>20</sup>), *Catajapyx aquilonaris*  
95 (gene set Caqu\_2.0, NCBI GCA\_000934665.2<sup>21</sup>), *Centruroides sculpturatus* (OGS  
96 version 2.0<sup>22</sup>), *Cimex lectularius* (OGS version 1.2<sup>23</sup>), *Daphnia pulex* (OGS version  
97 1.0<sup>24</sup>), *Dendroctonus ponderosae* (OGS version 1.0<sup>25</sup>), *Drosophila melanogaster* (OGS  
98 version r6.03<sup>26</sup>), *Drosophila simulans* (OGS version r1.4<sup>27</sup>), *Eriocheir sinensis* (gene set  
99 version 1.0; NCBI GCA\_013436485.1<sup>28</sup>), *Eurytemora affinis* (gene set version AFF\_2.0;  
100 NCBI GCA\_000591075.2<sup>29</sup>), *Harpegnathos saltator* (OGS version 3.3<sup>20</sup>), *Hyalella azteca*  
101 (gene set version Hazt\_2.0<sup>30</sup>), *Ixodes scapularis* (gene set version JCVI\_ISG\_i3\_1.0<sup>31</sup>),  
102 *Latrodectus hesperus* (gene set version Lhes\_2.0; NCBI GCA\_000697925.2),  
103 *Lepeophtheirus salmonis* (gene set version LSal-F-Atl-CAN-001; NCBI 001005205.1),  
104 *Limulus polyphemus* (gene set version 2.1.2; NCBI GCF\_000517525.1<sup>32</sup>), *Macrotermes*  
105 *natalensis* (gene set version 1.2<sup>33</sup>), *Manduca sexta* (OGS version 2<sup>34</sup>), *Nasonia*  
106 *vitripennis* (OGS version 2.26<sup>35</sup>), *Parasteatoda tepidariorum* (gene set version aug3.1<sup>22</sup>),  
107 *Pediculus humanus* (gene set version U2.1<sup>36</sup>), *Rhodnius prolixus* (gene set version.  
108 C1.2<sup>37</sup>), *Sarcoptes scabiei* (gene set version SscaA1<sup>38</sup>), *Stegodyphus mimosarum* (gene  
109 set version 1; NCBI GCA\_000611955.2<sup>39</sup>), *Strigamia maritima* (gene set version

110 Smar1<sup>40</sup>), *Tetranychus urticae* (gene set version 1.0<sup>41</sup>), *Tribolium castaneum* (OGS  
111 version Tcas2.0<sup>42</sup>), *Tigriopus californicus* (gene set version Tcal\_SD\_v2.1; NCBI  
112 GCA\_007210705.1), *Zootermopsis nevadensis* (OGS version 2.2<sup>43</sup>).

113

#### 114 *Gene tree inference*

115

116 The amino acid sequences of a given gene family were aligned with MAFFT<sup>44</sup> version  
117 7.123 and applying the run parameters “--maxiterate 1000 --globalpair --reorder”. The  
118 resulting multiple amino acid sequence alignments were analyzed with IQ-TREE<sup>45</sup>  
119 version 1.6 to infer a gene tree of each gene family under the maximum likelihood  
120 optimality criterion. We used the corrected Akaike information criterion (AICc) to select  
121 the best-fitting amino acid substitution model for each gene family separately (IQ-TREE  
122 option: “-m TESTNEW -msub nuclear -madd LG4M, LG4X”). Branch support was  
123 inferred by using 1) ultrafast bootstrapping (UFBoot2) and specifying the run parameters  
124 “-bb 10000” and “-bnni” and 2) Shimodaira-Hasegawa approximate likelihood ratio tests  
125 ([SH]-aLRT; IQ-TREE option: -alrt 10000)<sup>46</sup>. Branch support was considered reliable if  
126 SH-aLRT was larger or equal 80 % and UFboot was larger or equal 95 %. We used  
127 FigTree version 1.4.3 (<http://tree.bio.ed.ac.uk/software/figtree/>) to midway-root the  
128 inferred gene trees. Because FigTree is known to map in some situations branch  
129 support values to wrong branches when re-rooting a tree<sup>47</sup>, we visually verified all  
130 bootstrap values with the Interactive Tree of Life (ITOL)<sup>48</sup> version 3 online tool. The gene  
131 trees were further processed and annotated, using information from FlyAtlas2<sup>49</sup>, with

132 Inkscape 1.1 (<http://www.inkscape.org/>). The width of each clade was computed as the  
133 number of gene copies per species within each clade.

134

135 *Modifications applied for whole mount in situ hybridization*

136

137 Whole-mount RNA *in situ* hybridization was done following the protocol for staining  
138 genes in brains and ovaries of adults given by <sup>50</sup> with the following modifications: step  
139 14, probes were diluted in 300  $\mu$ L (not in 50  $\mu$ L); step 17, tissues were kept in wash  
140 buffer at 57 °C for 1 h (not overnight); step 20, we used the anti-Fluorescein-AP Fab  
141 fragment [150 Units] (Roche, Mannheim, Germany) or the anti-Digoxigenin-AP Fab  
142 fragment [150 Units] (Roche, Mannheim, Germany) antibodies depending on the  
143 riboprobes and on the RNA labelling mix used to synthesize it. Stained samples were  
144 rehydrated into PBS, dissected and mounted before imaging.

145

146 *Gene selection for knockdown experiments*

147

148 Genes selected for knockdown experiments were found expressed in oenocytes (except  
149 *GB51238*, see below), showed a high absolute  $\log_2$ -fold change value (*Supplementary*  
150 *Tables 7, 8, and 9*), and were chosen to represent a variety of gene families (we tried to  
151 investigate at least one gene per gene families). We decided to investigate desaturase  
152 *GB51238*, even though it was found to be expressed in trophocytes, since it was one of  
153 the three co-orthologs of the gene candidate *g14712*. While the other two genes are

154 expressed in oenocytes, we intentionally decided to select *GB51238* to assess a  
155 possible involvement also of trophocytes in CHC biosynthesis.

156

### 157 *Double-stranded RNA synthesis*

158

159 We synthesized dsRNA from the same 387–774-bp-long DNA fragments that we had  
160 cloned to facilitate anti-sense riboprobe synthesis. Specifically, template DNA for dsRNA  
161 synthesis was generated by PCR-amplifying with the Phusion High Fidelity kit (New  
162 England Biolabs, Ipswich, MA, USA) the plasmid inserts using an oligonucleotide primer  
163 listed for the specific gene in *Supplementary Table 10* at one end and a T7  
164 oligonucleotide primer at the other end of the plasmid insert. By reversing the order of  
165 the oligonucleotides, we obtained dsRNA template DNA with the T7 promotor sequence  
166 on different sides of the amplicon.

167

### 168 **Reference supplementary Methods**

169 1. Bolger, A. M., Lohse, M. & Usadel, B. Trimmomatic: a flexible trimmer for Illumina  
170 sequence data. *Bioinformatics* **30**, 2114–2120 (2014).

171 2. Petersen, M., Armisén, D., Gibbs, R. A., Hering, L., Khila, A., Mayer, G., Richards,  
172 S., Niehuis, O., Misof, B. Diversity and evolution of the transposable element repertoire  
173 in arthropods with particular reference to insects. *BMC Evol. Biol.* **19**, 1–15 (2019).

174 3. Jurka, J., Kapitonov, V. V., Pavlicek, A., Klonowski, P., Kohany, O., Walichiewicz,  
175 J. Repbase Update, a database of eukaryotic repetitive elements. *Cytogenet. Genome*  
176 *Res.* **110**, 462–467 (2005). Accessed 1 Sept 2016.



177 4. Bailly-Bechet M., Haudry A., Lerat E. One code to find them all: a Perl tool to  
178 conveniently parse RepeatMasker output files. *Mob. DNA* **5**, 13 (2014).

179 5. Hoff, K. J., Lange, S., Lomsadze, A., Borodovsky, M. & Stanke, M. BRAKER1:  
180 unsupervised RNA-Seq-based genome annotation with GeneMark-ET and  
181 AUGUSTUS. *Bioinformatics* **32**, 767–769 (2016).

182 6. Kim, D., Langmead, B. & Salzberg, S. L. HISAT: a fast spliced aligner with low  
183 memory requirements. *Nat. Methods* **12**, 357–360 (2015).

184 7. Kim, D., Paggi, J.M., Park, C. et al. Graph-based genome alignment and  
185 genotyping with HISAT2 and HISAT-genotype. *Nat. Biotechnol.* **37**, 907–915 (2019).

186 8. Li, H., Handsaker, B., Wysoker, A., Fennell, T., Ruan, J., Homer, N., Marth, G.,  
187 Abecasis, G. & Durbin, R. The sequence alignment/map format and SAMtools.  
188 *Bioinformatics* **25**, 2078–2079 (2009).

189 9. Barnett, D. W., Garrison, E. K., Quinlan, A. R., Strömberg, M. P. & Marth, G. T.  
190 BamTools: a C++ API and toolkit for analyzing and managing BAM files. *Bioinformatics*  
191 **27**, 1691–1692 (2011).

192 10. Besemer, J. & Borodovsky, M. GeneMark: web software for gene finding in  
193 prokaryotes, eukaryotes and viruses. *Nucleic acids Res.* **33**, W451–W454 (2005).

194 11. Stanke, M., Steinkamp, R., Waack, S. & Morgenstern, B. AUGUSTUS: a web  
195 server for gene finding in eukaryotes. *Nucleic acids Res.* **32**, W309–W312 (2004).

196 12. Camacho C., Coulouris G., Avagyan V., Ma N., Papadopoulos J., Bealer K. &  
197 Madden T.L. "BLAST+: architecture and applications." *BMC Bioinformatics* **10**, 421  
198 (2008).

199 13. Johnson, M., Zaretskaya, I., Raytselis, Y., Merezhuk, Y., McGinnis, S. &  
200 Madden, T. L. (2008). NCBI BLAST: a better web interface. *Nucleic Acids Res.* **36**, W5–  
201 W9 (2008).

202 14. Nygaard, S., Zhang, G., Schiøtt, M., Li, C., Wurm, Y., Hu, H., et al. The genome  
203 of the leaf-cutting ant *Acromyrmex echinator* suggests key adaptations to advanced  
204 social life and fungus farming. *Genome Res.* **21**, 1339–1348 (2011).

205 15. Nene, V., Wortman, J. R., Lawson, D., Haas, B., Kodira, C., Tu, Z. J., et al.  
206 Genome sequence of *Aedes aegypti*, a major arbovirus vector. *Science* **316**, 1718–1723  
207 (2007).

208 16. Elsik, C. G., Worley, K. C., Bennett, A. K., Beye, M., Camara, F., Childers, C. P.,  
209 de Graaf, D. C., Debyser, G., Deng, J., Devreese, B., et al. Finding the missing honey  
210 bee genes: lessons learned from a genome upgrade. *BMC Genomics* **15**, 1–29 (2014).

211 17. Sadd, B. M., Barribeau, S. M., Bloch, G., De Graaf, D. C., Dearden, P., Elsik, C.  
212 G., et al. The genomes of two key bumblebee species with primitive eusocial  
213 organization. *Genome Biol.* **16**, 1–32 (2015).

214 18. International Silkworm Genome Consortium. The genome of a lepidopteran  
215 model insect, the silkworm *Bombyx mori*. *Insect Biochem. Mol. Biol.* **38**, 1036–1045  
216 (2008).

217 19. Ioannidis, P., Simao, F. A., Waterhouse, R. M., Manni, M., Seppey, M.,  
218 Robertson, H. M., Misof, B., Niehuis, O., Zdobnov, E. M. Genomic features of the  
219 damselfly *Calopteryx splendens* representing a sister clade to most insect orders.  
220 *Genome Biol. Evol.* **9**, 415–430 (2017).

221 20. Bonasio, R., Zhang, G., Ye, C., Mutti, N. S., Fang, X., Qin, N., Donahue, G.,  
222 Yang, P., Li, Q., Li, C., Zhang, P., Huang, Z., Berger, S. L., Reinberg, D., Wang, J.,  
223 Liebig, J. Genomic comparison of the ants *Camponotus floridanus* and *Harpegnathos*  
224 *saltator*. *Science* **329**,1068–1071 (2010).

225 21. Thomas, G. W. C., Dohmen, E., Hughes, D. S. T., Murali, S. C., Poelchau, M.,  
226 Glastad, K., Anstead, C. A., Ayoub, N. A., Batterham, P., Bellair, M. et al. Gene content  
227 evolution in the arthropods. *Genome Biol.* **21**, 15 (2020).

228 22. Schwager, E. E., Sharma, P. P., Clarke, T., Leite, D. J., Wierschin, T.,  
229 Pechmann, M., et al. The house spider genome reveals an ancient whole-genome  
230 duplication during arachnid evolution. *BMC Biol.* **15**, 1–27 (2017).

231 23. Rosenfeld, J. A., Reeves, D., Brugler, M. R., Narechania, A., Simon, S., Durrett,  
232 R., et al. Genome assembly and geospatial phylogenomics of the bed bug *Cimex*  
233 *lectularius*. *Nat. Commun.* **7**, 1–10 (2016).

234 24. Colbourne, J. K., Pfrender, M. E., Gilbert, D., Thomas, W. K., Tucker, A., Oakley,  
235 T. H., Tokishita, S., Aerts, A., Arnold, G. J., Basu, M. K., et al. The ecoresponsive  
236 genome of *Daphnia pulex*. *Science* **331**, 555–561 (2011).

237 25. Keeling, C. I., Yuen, M. M., Liao, N. Y., Docking, T. R., Chan, S. K., Taylor, G.  
238 A., et al. Draft genome of the mountain pine beetle, *Dendroctonus ponderosae* Hopkins,  
239 a major forest pest. *Genome Biol.* **14**, 1–20 (2013).

240 26. Adams, M. D., Celniker, S. E., Holt, R. A., Evans, C. A., Gocayne, J. D.,  
241 Amanatides, P. G., Scherer, S. E., Li, P.W. et al. The genome sequence of *Drosophila*  
242 *melanogaster*. *Science* **287**, 2185–2195 (2000).

243 27. Hu, T. T., Eisen, M. B., Thornton, K. R., Andolfatto, P. A second-generation  
244 assembly of the *Drosophila simulans* genome provides new insights into patterns of  
245 lineage-specific divergence. *Genome Res.* **23**, 89–98 (2013).

246 28. Cui, Z., Liu, Y., Yuan, J., Zhang, X., Ventura, T., Ma, K. Y., Sun, S., Song, C.,  
247 Zhan, D., Yang, Y. et al. The Chinese mitten crab genome provides insights into  
248 adaptive plasticity and developmental regulation. *Nat. Commun.* **12**, 2395 (2021).

249 29. Choi, B. S., Kim, D. H., Kim, M. S., Park, J. C., Lee, Y. H., Kim, H. J., Jeong, C.  
250 B., Hagiwara, A., Souissi, S., Lee, J. S. The genome of the European estuarine calanoid  
251 copepod *Eurytemora affinis*: Potential use in molecular ecotoxicology. *Mar. Pollut. Bull.*  
252 **166**, 112190 (2021).

253 30. Poynton, H. C., Hasenbein, S., Benoit, J. B., Sepulveda, M. S., Poelchau, M. F.,  
254 Hughes, D. S., et al. The toxicogenome of *Hyalella azteca*: a model for sediment  
255 ecotoxicology and evolutionary toxicology. *Environ. Sci. Technol.* **52**, 6009–6022 (2018).

256 31. Gulia-Nuss, M., Nuss, A. B., Meyer, J. M., Sonenshine, D. E., Roe, R. M.,  
257 Waterhouse, R. M., et al. Genomic insights into the *Ixodes scapularis* tick vector of Lyme  
258 disease. *Nat. Commun.* **7**, 1–13 (2016).

259 32. Simpson, S. D., Ramsdell, J. S., Watson III, W. H. & Chabot, C. C. (2017). The  
260 draft genome and transcriptome of the Atlantic horseshoe crab, *Limulus polyphemus*.  
261 *Int. J. Genomics* **2017**, 7636513 (2017).

262 33. Poulsen, M., Hu, H., Li, C., Chen, Z., Xu, L., Otani, S., et al. Complementary  
263 symbiont contributions to plant decomposition in a fungus-farming termite. *Proc. Natl.*  
264 *Acad. Sci. USA* **111**, 14500–14505 (2014).

265 34. Kanost, M. R., Arrese, E. L., Cao, X., Chen, Y. R., Chellapilla, S., Goldsmith, M.  
266 R., et al. Multifaceted biological insights from a draft genome sequence of the tobacco  
267 hornworm moth, *Manduca sexta*. *Insect Biochem. Mol. Biol.* **76**, 118–147 (2016).

268 35. Werren, J. H., Richards, S., Desjardins, C. A., Niehuis, O., Gadau, J., Colbourne,  
269 J. K. et al. Functional and evolutionary insights from the genomes of three parasitoid  
270 *Nasonia* species. *Science* **327**, 343–348 (2010).

271 36. Kirkness, E. F., Haas, B. J., Sun, W., Braig, H. R., Perotti, M. A., Clark, J. M., et  
272 al. Genome sequences of the human body louse and its primary endosymbiont provide  
273 insights into the permanent parasitic lifestyle. *Proc. Natl. Acad. Sci. USA* **107**, 12168–  
274 12173 (2010).

275 37. Mesquita, R. D., Vionette-Amaral, R. J., Lowenberger, C., Rivera-Pomar, R.,  
276 Monteiro, F. A., Minx, P., et al. Genome of *Rhodnius prolixus*, an insect vector of  
277 Chagas disease, reveals unique adaptations to hematophagy and parasite infection.  
278 *Proc. Natl. Acad. Sci. USA* **112**, 14936–14941 (2015).

279 38. Rider, S. D., Morgan, M. S. & Arlian, L. G. Draft genome of the scabies mite.  
280 *Parasit. Vectors* **8**, 1–14 (2015).

281 39. Sanggaard, K. W., Bechsgaard, J. S., Fang, X., Duan, J., Dyrland, T. F., Gupta,  
282 V., et al. Spider genomes provide insight into composition and evolution of venom and  
283 silk. *Nat. Commun.* **5**, 1–12 (2014).

284 40. Chipman, A. D., Ferrier, D. E., Brena, C., Qu, J., Hughes, D. S., Schröder, R.,  
285 Torres-Oliva, M., Znassi, N., Jiang, H., Almeida, F. C., Alonso, C. R., Apostolou, Z. et al.  
286 The first myriapod genome sequence reveals conservative arthropod gene content and

287 genome organisation in the centipede *Strigamia maritima*. *PLoS Biol.* **12**, e1002005  
288 (2014).

289 41. Grbić, M., Van Leeuwen, T., Clark, R. M., Rombauts, S., Rouzé, P., Grbić, V., et  
290 al. The genome of *Tetranychus urticae* reveals herbivorous pest adaptations. *Nature*  
291 **479**, 487–492 (2011).

292 42. Tribolium Genome Sequencing Consortium. The genome of the model beetle  
293 and pest *Tribolium castaneum*. *Nature* **452**, 949–955 (2008).

294 43. Terrapon, N., Li, C., Robertson, H. M., Ji, L., Meng, X., Booth, W., Chen, Z.,  
295 Childers, C. P., Glastad, K. M., Gokhale, K., Gowin, J., Gronenberg, W. et al. Molecular  
296 traces of alternative social organization in a termite genome. *Nat. Commun.* **5**, 3636  
297 (2014).

298 44. Katoh, K. & Standley, D. M. MAFFT multiple sequence alignment software  
299 version 7: improvements in performance and usability. *Mol. Biol. Evol.* **30**, 772–780  
300 (2013).

301 45. Nguyen, L. T., Schmidt, H. A., Von Haeseler, A. & Minh, B. Q. IQ-TREE: a fast  
302 and effective stochastic algorithm for estimating maximum-likelihood phylogenies. *Mol.*  
303 *Biol. Evol.* **32**, 268–274 (2015).

304 46. Guindon, S., Dufayard, J. F., Lefort, V., Anisimova, M., Hordijk, W. & Gascuel, O.  
305 New algorithms and methods to estimate maximum-likelihood phylogenies: assessing  
306 the performance of PhyML 3.0. *Syst. Biol.* **59**, 307–321 (2010).

307 47. Czech, L., Huerta-Cepas, J. & Stamatakis, A. A critical review on the use of  
308 support values in tree viewers and bioinformatics toolkits. *Mol. Biol. Evol.* **34**, 1535–1542  
309 (2017).

- 310 48. Letunic, I. & Bork, P. Interactive tree of life (iTOL) v3: an online tool for the  
311 display and annotation of phylogenetic and other trees. *Nucleic Acids Res.* **44**, W242–  
312 W245 (2016).
- 313 49. Leader, D. P., Krause, S. A., Pandit, A., Davies, S. A. & Dow, J. A. T. FlyAtlas 2:  
314 a new version of the *Drosophila melanogaster* expression atlas with RNA-Seq, miRNA-  
315 Seq and sex-specific data. *Nucleic Acids Res.* **46**, D809–D815 (2018).
- 316 50. Dearden, P. K., Duncan, E. J. & Wilson, M. J. Whole-mount in situ hybridization  
317 of honeybee (*Apis mellifera*) tissues. *Cold Spring Harb. Protoc.* **2009**, pdb-prot5225  
318 (2009).

319 **Supplementary Tables**

320

321 **Supplementary Table 1.** Sample dates of *Odynerus spinipes* females, kept in the  
 322 laboratory and whose cuticular hydrocarbon profile (chemotype) we studied multiple  
 323 times over the course of their adult life.

| Sample ID            | Chemo-type | Eclosion date  | 1 <sup>st</sup> sampling date | Age at 1 <sup>st</sup> sampling date | 2 <sup>nd</sup> sampling date | Age at 2 <sup>nd</sup> sampling date | 3 <sup>rd</sup> sampling date | Age at 3 <sup>rd</sup> sampling date |
|----------------------|------------|----------------|-------------------------------|--------------------------------------|-------------------------------|--------------------------------------|-------------------------------|--------------------------------------|
| ON_8469 <sup>a</sup> | 1          | April 25, 2016 | April 26, 2016                | 1                                    | May 4, 2016                   | 9                                    | May 11, 2016                  | 16                                   |
| ON_8471 <sup>b</sup> | 2          | April 25, 2016 | April 26, 2016                | 1                                    | May 2, 2016                   | 7                                    | May 9, 2016                   | 14                                   |
| ON_8473              | 2          | April 25, 2016 | April 27, 2016                | 2                                    | May 2, 2016                   | 7                                    | May 10, 2016                  | 15                                   |
| ON_8475 <sup>c</sup> | 1          | April 25, 2016 | April 26, 2016                | 1                                    | May 2, 2016                   | 7                                    | NA                            | NA                                   |
| ON_8477 <sup>d</sup> | 2          | April 25, 2016 | April 26, 2016                | 1                                    | May 4, 2016                   | 9                                    | NA                            | NA                                   |
| ON_8479              | 1          | April 25, 2016 | April 27, 2016                | 2                                    | May 2, 2016                   | 7                                    | May 10, 2016                  | 15                                   |
| ON_8481              | 1          | April 25, 2016 | April 27, 2016                | 2                                    | May 2, 2016                   | 7                                    | May 10, 2016                  | 15                                   |
| ON_8483              | 1          | April 25, 2016 | April 27, 2016                | 2                                    | May 2, 2016                   | 7                                    | May 10, 2016                  | 15                                   |
| ON_8485              | 2          | April 25, 2016 | April 27, 2016                | 2                                    | May 3, 2016                   | 8                                    | May 9, 2016                   | 14                                   |
| ON_8487              | 1          | April 25, 2016 | April 27, 2016                | 2                                    | May 2, 2016                   | 7                                    | NA                            | NA                                   |
| ON_8489              | 2          | April 25, 2016 | April 27, 2016                | 2                                    | May 3, 2016                   | 8                                    | May 10, 2016                  | 15                                   |
| ON_8491              | 2          | April 26, 2016 | April 27, 2016                | 1                                    | May 3, 2016                   | 7                                    | May 9, 2016                   | 13                                   |
| ON_8493              | 2          | April 26, 2016 | April 28, 2016                | 2                                    | May 3, 2016                   | 7                                    | May 10, 2016                  | 14                                   |
| ON_8495              | 2          | April 26, 2016 | April 28, 2016                | 2                                    | May 2, 2016                   | 6                                    | NA                            | NA                                   |
| ON_8497              | 2          | April 26, 2016 | April 28, 2016                | 2                                    | May 2, 2016                   | 6                                    | NA                            | NA                                   |
| ON_8499              | 1          | April 26, 2016 | April 28, 2016                | 2                                    | May 3, 2016                   | 7                                    | May 9, 2016                   | 13                                   |
| ON_8501              | 2          | April 26, 2016 | April 28, 2016                | 2                                    | May 3, 2016                   | 7                                    | May 9, 2016                   | 13                                   |
| ON_8503              | 2          | April 26, 2016 | April 28, 2016                | 2                                    | May 3, 2016                   | 7                                    | May 10, 2016                  | 14                                   |
| ON_8505              | 2          | April 26, 2016 | April 28, 2016                | 2                                    | May 3, 2016                   | 7                                    | May 9, 2016                   | 13                                   |
| ON_8507              | 2          | April 27, 2016 | April 29, 2016                | 2                                    | May 4, 2016                   | 7                                    | May 10, 2016                  | 13                                   |
| ON_8509              | 1          | April 27, 2016 | April 29, 2016                | 2                                    | May 2, 2016                   | 5                                    | NA                            | NA                                   |
| ON_8511              | 2          | April 27, 2016 | April 29, 2016                | 2                                    | May 4, 2016                   | 7                                    | May 10, 2016                  | 13                                   |
| ON_8513              | 1          | April 27, 2016 | April 29, 2016                | 2                                    | May 4, 2016                   | 7                                    | May 11, 2016                  | 14                                   |
| ON_8515              | 2          | April 27, 2016 | April 29, 2016                | 2                                    | May 4, 2016                   | 7                                    | May 11, 2016                  | 14                                   |
| ON_8517              | 2          | April 27, 2016 | April 29, 2016                | 2                                    | May 4, 2016                   | 7                                    | May 11, 2016                  | 14                                   |
| ON_8519              | 1          | April 27, 2016 | April 28, 2016                | 1                                    | May 4, 2016                   | 7                                    | May 11, 2016                  | 14                                   |
| ON_8521              | 1          | April 28, 2016 | April 29, 2016                | 1                                    | NA                            | NA                                   | NA                            | NA                                   |
| ON_8523              | 2          | April 27, 2016 | April 29, 2016                | 2                                    | May 4, 2016                   | 7                                    | May 11, 2016                  | 14                                   |
| ON_8525              | 2          | April 28, 2016 | April 29, 2016                | 1                                    | NA                            | NA                                   | NA                            | NA                                   |
| ON_8527              | 1          | April 28, 2016 | April 29, 2016                | 1                                    | NA                            | NA                                   | NA                            | NA                                   |

324 <sup>a</sup> Extracurricular sampling at April 29, 2016 (wasp's age: 4 days)

325 <sup>b</sup> Extracurricular sampling at April 27, 2016 (wasp's age: 3 days)

326 <sup>c</sup> Extracurricular sampling at April 27, 2016 (wasp's age: 2 days)

327 <sup>d</sup> Extracurricular sampling at April 29, 2016 (wasp's age: 4 days)

328



329 **Supplementary Table 2.** Sample dates of *Odynerus spinipes* females whose cuticular  
 330 hydrocarbon profile (chemotype) we studied multiple times over the course of their adult  
 331 life at two field sites (Büchelberg [B; 49.027985, 8.164801] and Tenneville [T;  
 332 50.100671, 5.530061]).

| Sample ID | Chemo-type | 1 <sup>st</sup> sampling date | Idle time (days) | 2 <sup>nd</sup> sampling date | Idle time (days) | 3 <sup>rd</sup> sampling date | Idle time (days) | 4 <sup>th</sup> sampling date | Field site |
|-----------|------------|-------------------------------|------------------|-------------------------------|------------------|-------------------------------|------------------|-------------------------------|------------|
| ON_8651   | 1          | June 7, 2016                  | 8                | June 15, 2016                 | NA               | NA                            | NA               | NA                            | B          |
| ON_8653   | 1          | June 7, 2016                  | 13               | June 20, 2016                 | NA               | NA                            | NA               | NA                            | B          |
| ON_8663   | 1          | June 15, 2016                 | 5                | June 20, 2016                 | NA               | NA                            | NA               | NA                            | B          |
| ON_8671   | 2          | May 27, 2017                  | 4                | June 31, 2017                 | 8                | June 8, 2017                  | NA               | NA                            | B          |
| ON_8673   | 1          | May 27, 2017                  | 6                | June 2, 2017                  | 6                | June 8, 2017                  | 11               | June 19, 2017                 | B          |
| ON_8675   | 1          | May 31, 2017                  | 8                | June 8, 2017                  | 11               | June 19, 2017                 | NA               | NA                            | B          |
| ON_8677   | 2          | May 31, 2017                  | 8                | June 8, 2017                  | NA               | NA                            | NA               | NA                            | B          |
| ON_8693   | 1          | June 10, 2017                 | 3                | June 13, 2017                 | 2                | June 15, 2017                 | NA               | NA                            | B          |
| ON_8699   | 2          | June 10, 2017                 | 3                | June 13, 2017                 | NA               | NA                            | NA               | NA                            | B          |
| ON_8709   | 2          | June 13, 2017                 | 6                | June 19, 2017                 | 3                | June 21, 2017                 | NA               | NA                            | B          |
| ON_8721   | 2          | June 21, 2017                 | 2                | June 23, 2017                 | NA               | NA                            | NA               | NA                            | B          |
| ON_8723   | 2          | June 21, 2017                 | 2                | June 23, 2017                 | NA               | NA                            | NA               | NA                            | B          |
| ON_8725   | 1          | July 3, 2017                  | 2                | July 5, 2017                  | NA               | NA                            | NA               | NA                            | T          |
| ON_8729   | 2          | July 3, 2017                  | 2                | July 5, 2017                  | NA               | NA                            | NA               | NA                            | T          |
| ON_8733   | 2          | July 3, 2017                  | 3                | July 6, 2017                  | NA               | NA                            | NA               | NA                            | T          |
| ON_8735   | 2          | July 3, 2017                  | 3                | July 6, 2017                  | NA               | NA                            | NA               | NA                            | T          |
| ON_8737   | 2          | July 4, 2017                  | 2                | July 6, 2017                  | NA               | NA                            | NA               | NA                            | T          |
| ON_8745   | 1          | July 4, 2017                  | 2                | July 6, 2017                  | NA               | NA                            | NA               | NA                            | T          |

333

334 **Supplementary Table 3.** Information to *Odynerus spinipes* transcriptomes we sequenced  
335 and used to facilitate annotation of the *Odynerus spinipes* draft genome.

| Sample ID | Tissue ID   | Sex    | Chemo-type | Tissue     | Sampling location | Collection date | Genbank acc. no. |
|-----------|-------------|--------|------------|------------|-------------------|-----------------|------------------|
| ON_6860   | Odsp_RNA_05 | female | 1          | whole body | Büchelberg        | May 19, 2014    | SRR14729246      |
| ON_6859   | Odsp_RNA_09 | female | 2          | whole body | Büchelberg        | May 19, 2014    | SRR14729245      |
| ON_6846   | Odsp_RNA_08 | male   | NA         | whole body | Büchelberg        | May 18, 2014    | SRR14729244      |

336

337 **Supplementary Table 4.** Adult *Odynerus spinipes* females whose metasoma  
 338 transcriptomes we sequenced and which we collected near Bad Muskau (51.548200,  
 339 14.714900), Büchelberg (49.027985, 8.164801), and Eichenzell (50.495927, 9.704589).

| Sample ID | GenBank accession number | Chemo-type | Collection site | RNA fixation date | Age class | Batch no. |
|-----------|--------------------------|------------|-----------------|-------------------|-----------|-----------|
| ON_7724   | SAMN14256292             | 1          | Büchelberg      | January 27, 2015  | 12–38 h   | 1         |
| ON_7728   | SAMN14256293             | 1          | Büchelberg      | January 29, 2015  | 12–38 h   | 1         |
| ON_7747   | SAMN14256294             | 1          | Büchelberg      | February 12, 2015 | 12–38 h   | 1         |
| ON_7723   | SAMN14256295             | 2          | Büchelberg      | January 27, 2015  | 12–38 h   | 1         |
| ON_7730   | SAMN14256296             | 2          | Büchelberg      | January 29, 2015  | 12–38 h   | 1         |
| ON_7739   | SAMN14256297             | 2          | Büchelberg      | January 31, 2015  | 12–38 h   | 1         |
| ON_8683   | SAMN14256301             | 1          | Büchelberg      | June 3, 2017      | 48–62 h   | 2         |
| ON_8685   | SAMN14256302             | 1          | Büchelberg      | June 3, 2017      | 48–62 h   | 2         |
| ON_12769  | SAMN14256298             | 1          | Eichenzell      | June 12, 2016     | 48–62 h   | 2         |
| ON_8687   | SAMN14256303             | 2          | Büchelberg      | June 6, 2017      | 48–62 h   | 2         |
| ON_12771  | SAMN14256299             | 2          | Eichenzell      | June 14, 2016     | 48–62 h   | 2         |
| ON_12775  | SAMN14256300             | 2          | Bad Muskau      | May 17, 2017      | 48–62 h   | 2         |

340

341 **Supplementary Table 5.** *Odynerus spinipes* genes significantly differentially expressed  
 342 in batch 1-females with different chemotype. The table shows the gene IDs, the  $\log_2$ -fold  
 343 change values (values < 0 indicate higher expression of genes in females with  
 344 chemotype 2 than in females with chemotype 1), the  $p$ -value obtained with DESeq2, the  
 345 adjusted  $p$ -value from applying the false discovery rate (FDR), and the predicted  
 346 function of the genes based on homology.

| Gene   | Mean      | Log2fold- | pval  | FDR   | Predicted function based on homology                                        |
|--------|-----------|-----------|-------|-------|-----------------------------------------------------------------------------|
| g10050 | 3237.95   | 5.92      | 0.000 | 0.000 | elongation of very long chain fatty acids protein 1-like                    |
| g11859 | 808.04    | 5.08      | 0.000 | 0.000 | NA                                                                          |
| g10048 | 3800.63   | 4.81      | 0.000 | 0.000 | elongation of very long chain fatty acids protein 1-like                    |
| g10049 | 2635.75   | 3.83      | 0.000 | 0.000 | elongation of very long chain fatty acids protein 1-like                    |
| g7007  | 1083.91   | 3.44      | 0.000 | 0.000 | elongation of very long chain fatty acids protein 1-like                    |
| g5191  | 250.68    | 1.83      | 0.000 | 0.000 | venom protein                                                               |
| g14437 | 38.71     | 1.68      | 0.000 | 0.000 | endonuclease-reverse transcriptase                                          |
| g9972  | 21.72     | 1.29      | 0.000 | 0.000 | histone-lysine N-methyltransferase SETMAR-like                              |
| g9971  | 36.39     | 1.34      | 0.000 | 0.000 | PREDICTED: histone-lysine N-methyltransferase SETMAR-like                   |
| g12443 | 5803.23   | 1.20      | 0.000 | 0.000 | elongation of very long chain fatty acids protein 1-like                    |
| g3041  | 1484.29   | 1.13      | 0.000 | 0.000 | serine-rich adhesin for platelets                                           |
| g13710 | 100.86    | 1.09      | 0.000 | 0.000 | mucin-3A                                                                    |
| g14860 | 120.01    | 1.20      | 0.000 | 0.001 | NA                                                                          |
| g8981  | 1988.04   | 1.11      | 0.000 | 0.003 | glycosyltransferase family 1 protein                                        |
| g2126  | 332.91    | 1.15      | 0.000 | 0.003 | arylphorin subunit alpha-like                                               |
| g6203  | 1174.03   | 1.14      | 0.000 | 0.003 | tetra-peptide repeat homeobox protein 1-like                                |
| g13132 | 1732.04   | 0.74      | 0.000 | 0.010 | transient receptor potential cation channel trpm                            |
| g3744  | 142162.00 | 0.84      | 0.000 | 0.010 | apolipoporphins                                                             |
| g7125  | 1737.39   | 0.66      | 0.000 | 0.011 | lipoamide acyltransferase component of branched-chain alpha-keto acid dehy- |
| g7239  | 107.52    | 0.96      | 0.000 | 0.011 | Protein apterous                                                            |
| g4311  | 1176.17   | 0.82      | 0.000 | 0.016 | DEAD-box ATP-dependent RNA helicase 20-like                                 |
| g785   | 16782.44  | 0.87      | 0.000 | 0.024 | pupal cuticle protein-like                                                  |
| g11772 | 175.40    | 0.96      | 0.000 | 0.025 | diacylglycerol kinase kappa                                                 |
| g8320  | 27.63     | 0.96      | 0.000 | 0.029 | PREDICTED: piggyBac transposable element-derived protein 4-like             |
| g8919  | 67.30     | 0.93      | 0.000 | 0.036 | NA                                                                          |
| g3244  | 2434.25   | 0.70      | 0.000 | 0.046 | formin-2-like                                                               |
| g3764  | 634.11    | 0.95      | 0.000 | 0.049 | cytochrome P450 4g15-like                                                   |
| g12825 | 729.30    | 0.75      | 0.000 | 0.049 | adenylate kinase isoenzyme 5                                                |
| g3930  | 10.29     | 0.81      | 0.000 | 0.049 | NA                                                                          |
| g501   | 626.61    | 0.72      | 0.000 | 0.049 | farnesol dehydrogenase-like                                                 |
| g10135 | 279.53    | -4.76     | 0.000 | 0.000 | Retrovirus-related Pol polyprotein from transposon TNT 1-94                 |
| g14547 | 58.50     | -2.54     | 0.000 | 0.000 | retrovirus-related pol polyprotein from transposon tnt 1-94                 |
| g7008  | 6557.42   | -2.09     | 0.000 | 0.000 | elongation of very long chain fatty acids protein 1-like                    |
| g3158  | 773.28    | -1.79     | 0.000 | 0.000 | fatty acid synthase-like                                                    |
| g3059  | 2296.06   | -1.55     | 0.000 | 0.000 | secretin receptor-like                                                      |
| g7616  | 10013.21  | -1.19     | 0.000 | 0.000 | elongation of very long chain fatty acids protein AAEL008004-like           |
| g8887  | 24.51     | -1.31     | 0.000 | 0.000 | gag-pol polyprotein                                                         |
| g11719 | 158.60    | -1.28     | 0.000 | 0.000 | Copia protein                                                               |
| g1571  | 917.36    | -1.27     | 0.000 | 0.000 | putative fatty acyl-CoA reductase CG5065                                    |
| g2403  | 3821.09   | -0.67     | 0.000 | 0.000 | mitochondrial cardiolipin hydrolase-like protein                            |
| g283   | 420.58    | -0.96     | 0.000 | 0.000 | rhythmically expressed gene 5 protein                                       |
| g6414  | 346.83    | -1.04     | 0.000 | 0.003 | alanine--glyoxylate aminotransferase 2 homolog 1. mitochondrial             |
| g1635  | 8335.84   | -1.08     | 0.000 | 0.006 | group XV phospholipase A2-like                                              |
| g13265 | 1344.43   | -1.10     | 0.000 | 0.007 | fatty acid-binding protein, adipocyte-like                                  |
| g14712 | 26410.19  | -0.99     | 0.000 | 0.008 | PREDICTED: acyl-CoA Delta(11) desaturase-like                               |
| g11240 | 21.69     | -0.96     | 0.000 | 0.013 | transposable element tcb1 transposase                                       |
| g13220 | 227.21    | -1.02     | 0.000 | 0.014 | PREDICTED: odorant receptor 47a-like                                        |
| g1176  | 774.11    | -0.72     | 0.000 | 0.018 | octopamine receptor beta-3R-like                                            |
| g3272  | 58.24     | -1.02     | 0.000 | 0.020 | ranBP-type and C3HC4-type zinc finger-containing protein 1-like             |
| g2861  | 593.75    | -0.67     | 0.000 | 0.024 | NA                                                                          |
| g7590  | 672.52    | -0.72     | 0.000 | 0.027 | ADP-ribosylation factor-like protein 13B                                    |
| g2290  | 1358.50   | -0.84     | 0.000 | 0.029 | fatty-acid amide hydrolase 2-B-like                                         |
| g4379  | 88.95     | -0.92     | 0.000 | 0.039 | cytochrome b5-like                                                          |
| g5819  | 151.70    | -0.89     | 0.000 | 0.040 | enhancer of split mgamma protein-like                                       |
| g14091 | 153.94    | -0.89     | 0.000 | 0.043 | gustatory receptor 5a for trehalose-like                                    |
| g11201 | 27.79     | -0.93     | 0.000 | 0.043 | zinc finger DNA binding protein                                             |
| g4709  | 917.27    | -0.91     | 0.000 | 0.043 | alpha-tocopherol transfer protein-like                                      |
| g8089  | 55.04     | -0.93     | 0.000 | 0.043 | rna-dependent dna polymerase                                                |
| g2711  | 274.01    | -0.92     | 0.000 | 0.046 | interaptin-like                                                             |

347 **Supplementary Table 6.** *Odynerus spinipes* genes significantly differentially expressed  
 348 in batch 2-females with different chemotype. The table shows the gene IDs, the  $\log_2$ -fold  
 349 change values (values < 0 indicate higher expression of genes in females with  
 350 chemotype 2 than in females with chemotype 1), the  $p$ -value obtained with DESeq2, the  
 351 adjusted  $p$ -value from applying the false discovery rate (FDR), and the predicted  
 352 function of the genes based on homology.

| Gene id | Mean     | Log2fold-change | $p$   | FDR    | Predicted function based on homology                              |
|---------|----------|-----------------|-------|--------|-------------------------------------------------------------------|
| g1053   | 31045.54 | 1.68            | 0.000 | 0.004  | maternal effect protein oskar                                     |
| g7363   | 627.12   | 1.69            | 0.000 | 0.007  | probable phospholipid-transporting ATPase IF                      |
| g7362   | 87.64    | 2.27            | 0.000 | 0.008  | 2-oxoglutarate dehydrogenase, mitochondrial-like                  |
| g13468  | 4344.05  | 2.17            | 0.000 | 0.013  | ejaculatory bulb-specific protein 3-like                          |
| g3754   | 615.06   | 1.90            | 0.000 | 0.013  | lipase 3-like                                                     |
| g5503   | 59.11    | 2.14            | 0.000 | 0.013  | broad-complex core protein isoforms 1/2/3/4/5-like                |
| g499    | 172.13   | 1.74            | 0.000 | 0.030  | NA                                                                |
| g13957  | 754.88   | 2.01            | 0.000 | 0.032  | synaptic vesicle glycoprotein 2C-like                             |
| g7599   | 891.43   | 1.92            | 0.000 | 0.032  | NA                                                                |
| g5507   | 357.76   | 1.97            | 0.000 | 0.036  | broad-complex core protein isoforms 1/2/3/4/5-like                |
| g7908   | 1069.05  | 1.97            | 0.000 | 0.036  | follicle cell protein 3C-1                                        |
| g9268   | 178.33   | 1.93            | 0.000 | 0.0419 | location of vulva defective 1-like                                |
| g4638   | 1877.10  | 1.09            | 0.000 | 0.0493 | lethal(2) giant larvae protein homolog 1                          |
| g14712  | 36159.52 | -3.85           | 0.000 | 0.000  | acyl-CoA Delta(11) desaturase-like                                |
| g283    | 2091.25  | -1.73           | 0.000 | 0.004  | rhythmically expressed gene 5 protein                             |
| g14676  | 2532.97  | -1.75           | 0.000 | 0.008  | 1-acyl-sn-glycerol-3-phosphate acyltransferase beta               |
| g3036   | 397.44   | -2.07           | 0.000 | 0.008  | heat shock protein 70 A2-like                                     |
| g6760   | 340.61   | -2.25           | 0.000 | 0.008  | tektin-B1                                                         |
| g3696   | 116.54   | -2.11           | 0.000 | 0.0128 | allatostatins                                                     |
| g531    | 2218.22  | -1.70           | 0.000 | 0.0128 | progesterin and adipoQ receptor family member 3                   |
| g1906   | 83.61    | -1.91           | 0.000 | 0.0128 | sodium-dependent nutrient amino acid transporter 1-like           |
| g1903   | 87.59    | -1.64           | 0.000 | 0.0161 | intraflagellar transport protein 46 homolog                       |
| g804    | 8223.24  | -1.67           | 0.000 | 0.0241 | long-chain fatty acid transport protein 4-like                    |
| g5799   | 117.19   | -1.38           | 0.000 | 0.030  | CD63 antigen                                                      |
| g2073   | 10007.80 | -2.03           | 0.000 | 0.030  | defensin-1-like                                                   |
| g10320  | 7903.07  | -1.65           | 0.000 | 0.032  | acyl-CoA-binding protein homolog                                  |
| g3695   | 4411.92  | -1.41           | 0.000 | 0.043  | protein amnionless-like                                           |
| g12587  | 602.56   | -1.29           | 0.000 | 0.048  | tyrosine-protein kinase transmembrane receptor Ror-like           |
| g12803  | 6816.84  | -1.41           | 0.000 | 0.048  | organic cation transporter protein-like                           |
| g3526   | 15054.44 | -1.92           | 0.000 | 0.048  | leucine-rich repeat-containing protein 15-like                    |
| g7616   | 29611.98 | -1.46           | 0.000 | 0.049  | elongation of very long chain fatty acids protein AAEL008004-like |

354 **Supplementary Table 7.** *Odynerus spinipes* genes significantly differentially expressed  
 355 in females with different chemotype in two batches of samples differing in age and  
 356 sampling location from each other (**Supplementary Table 4**). The table shows the  
 357 results from first globally assessing gene expression differences in batch 1 and  
 358 subsequently assessing whether those genes that are considered differentially  
 359 expressed based on false discovery rate (FDR) are also differentially expressed ( $p$ -value  
 360  $\leq 0.05$ ) in batch 2 after applying Holm-Bonferroni correction for multiple testing (number  
 361 of genes tested in batch 2) on the  $p$ -values provided by DESeq2.  $Log_2$ -fold change  
 362 values  $> 0$  indicate higher expression of genes in females with chemotype 1 than in  
 363 females with chemotype 2.  $Log_2$ -fold change values  $< 0$  indicate higher expression of  
 364 genes in females with chemotype 2 than in females with chemotype 1. Genes in bold  
 365 were significantly differently expressed in both batches.

| Gene ID       | Batch 1              |       |                         | Batch 2              |       |                         | Predicted function                                              |
|---------------|----------------------|-------|-------------------------|----------------------|-------|-------------------------|-----------------------------------------------------------------|
|               | $Log_2$ -fold change | $p$   | $p$ (adj.) <sup>1</sup> | $Log_2$ -fold change | $p$   | $p$ (adj.) <sup>2</sup> |                                                                 |
| <b>g283</b>   | -0.96                | 0.000 | 0.003                   | -1.73                | 0.000 | <b>0.000</b>            | <b>rhythmically expressed gene 5 protein</b>                    |
| g1571         | -1.27                | 0.000 | 0.000                   | -1.09                | 0.031 | 1.000                   | fatty acid reductase                                            |
| <b>g2290</b>  | -0.84                | 0.000 | 0.029                   | -1.79                | 0.000 | <b>0.019</b>            | <b>fatty acid amide hydrolase</b>                               |
| g3041         | 1.13                 | 0.000 | 0.000                   | -0.89                | 0.032 | 1.000                   | serine-rich adhesin for platelets                               |
| <b>g3059</b>  | -1.55                | 0.000 | 0.000                   | -1.71                | 0.000 | <b>0.013</b>            | <b>parathyroid hormone/related receptor</b>                     |
| g3158         | -1.79                | 0.000 | 0.000                   | -1.00                | 0.024 | 1.000                   | fatty acid synthase                                             |
| g4709         | -0.91                | 0.000 | 0.043                   | -1.14                | 0.021 | 1.000                   | alpha-tocopherol transfer protein-like                          |
| g6414         | -1.04                | 0.000 | 0.003                   | -1.19                | 0.018 | 0.968                   | alanine--glyoxylate aminotransferase 2 homolog 1, mitochondrial |
| <b>g7616</b>  | -1.19                | 0.000 | 0.000                   | -1.46                | 0.000 | <b>0.008</b>            | <b>fatty acid elongase</b>                                      |
| g12825        | 0.75                 | 0.000 | 0.049                   | 1.01                 | 0.002 | 0.090                   | adenylate kinase isoenzyme 5                                    |
| g14547        | -2.54                | 0.000 | 0.000                   | -1.09                | 0.018 | 0.968                   | retrovirus-related pol polyprotein from transposon tnt 1-94     |
| <b>g14712</b> | -0.99                | 0.000 | 0.008                   | -3.85                | 0.000 | <b>0.000</b>            | <b>fatty acid desaturase</b>                                    |

366  
367

<sup>1</sup> FDR

<sup>2</sup> Holm-Bonferroni correction for 60 tests

368 **Supplementary Table 8.** *Odynerus spinipes* genes significantly differentially expressed  
 369 in females with different chemotype in two batches of samples differing in age and  
 370 sampling location from each other (**Supplementary Table 4**). The table shows the  
 371 results from first globally assessing gene expression differences in batch 2 and  
 372 subsequently assessing whether those genes that are considered differentially  
 373 expressed based on false discovery rate (FDR) are also differentially expressed ( $p$ -value  
 374  $\leq 0.05$ ) in batch 1 when applying Holm-Bonferroni correction for multiple testing (number  
 375 of genes tested in batch 1) on the  $p$ -values provided by DESeq2.  $\text{Log}_2$ -fold change  
 376 values  $< 0$  indicate higher expression of genes in females with chemotype 2 than in  
 377 females with chemotype 1. Genes in bold were significantly differently expressed in both  
 378 batches.

| Gene ID       | Batch 2                     |       |                         | Batch 1                     |       |                         | Predicted function                                         |
|---------------|-----------------------------|-------|-------------------------|-----------------------------|-------|-------------------------|------------------------------------------------------------|
|               | $\text{Log}_2$ -fold change | $p$   | $p$ (adj.) <sup>1</sup> | $\text{Log}_2$ -fold change | $p$   | $p$ (adj.) <sup>2</sup> |                                                            |
| <b>g283</b>   | -1.73                       | 0.000 | 0.004                   | -0.96                       | 0.000 | <b>0.000</b>            | <b>rhythmically expressed gene 5 protein</b>               |
| g531          | -1.70                       | 0.000 | 0.013                   | -0.49                       | 0.025 | 0.685                   | progesterin and adipoQ receptor family member 3 isoform X1 |
| g7599         | 1.92                        | 0.000 | 0.032                   | -0.51                       | 0.048 | 1.000                   | NA                                                         |
| <b>g7616</b>  | -1.46                       | 0.000 | 0.049                   | -1.19                       | 0.000 | <b>0.000</b>            | <b>fatty acid elongase</b>                                 |
| g14676        | -1.75                       | 0.000 | 0.008                   | -0.52                       | 0.024 | 0.665                   | 1-acyl-sn-glycerol-3-phosphate acyltransferase alpha       |
| <b>g14712</b> | -3.85                       | 0.000 | 0.000                   | -0.99                       | 0.000 | <b>0.000</b>            | <b>fatty acid desaturase</b>                               |

379  
 380  
 381

<sup>1</sup> FDR

<sup>2</sup> Holm-Bonferroni correction for 31 tests

382 **Supplementary Table 9.** *Odynerus spinipes* genes encoding fatty acid synthases, fatty  
383 acid elongases, fatty acid desaturases, and fatty acid reductases and found significantly  
384 differentially expressed in females belonging to different age classes (**Supplementary**  
385 **Table 4**). Shown are the results from analyzing the twelve transcriptomes with the two  
386 software packages DESeq2 and EdgeR.  $\log_2$ -fold change values  $> 0$  indicate higher  
387 expression of genes in 48–62-h-old females than in 12–38-h-old females.  $\log_2$ -fold  
388 change values  $< 0$  indicates higher expression of genes in 12–38-h-old females than in  
389 48–62-h-old females. FDR: false discovery rate.

| Gene ID | DESeq2                |       |              | EdgeR                 |       |              | Gene family           |
|---------|-----------------------|-------|--------------|-----------------------|-------|--------------|-----------------------|
|         | $\log_2$ -fold change | $p$   | FDR          | $\log_2$ -fold change | $p$   | FDR          |                       |
| g1571   | 3.170                 | 0.001 | <b>0.001</b> | 4.691                 | 0.000 | <b>0.000</b> | fatty acid reductase  |
| g2413   | -0.767                | 0.003 | <b>0.003</b> | -0.813                | 0.002 | <b>0.010</b> | fatty acid reductase  |
| g3158   | 1.972                 | 0.017 | <b>0.017</b> | 4.361                 | 0.003 | <b>0.012</b> | fatty acid synthase   |
| g6537   | 1.482                 | 0.014 | <b>0.014</b> | 1.739                 | 0.006 | <b>0.022</b> | fatty acid elongase   |
| g7609   | NA                    | NA    | NA           | 2.711                 | 0.001 | <b>0.004</b> | fatty acid elongase   |
| g7610   | NA                    | NA    | NA           | 7.095                 | 0.000 | <b>0.000</b> | fatty acid elongase   |
| g7616   | 1.454                 | 0.004 | <b>0.004</b> | 1.602                 | 0.002 | <b>0.009</b> | fatty acid elongase   |
| g7620   | 1.449                 | 0.036 | <b>0.036</b> | NA                    | NA    | NA           | fatty acid elongase   |
| g7621   | NA                    | NA    | NA           | 3.535                 | 0.001 | <b>0.005</b> | fatty acid elongase   |
| g7842   | 1.208                 | 0.004 | <b>0.004</b> | 1.288                 | 0.001 | <b>0.005</b> | fatty acid reductase  |
| g14708  | -0.691                | 0.013 | <b>0.013</b> | -0.730                | 0.004 | <b>0.016</b> | fatty acid desaturase |

390



391 **Supplementary Table 10.** Number of samples from which cuticular hydrocarbon and  
 392 gene expression data were collected in RNAi experiments. The time between dsRNA  
 393 injection and data collection is specified in the column with the header  $\Delta t$ .

| Honey bee gene ID | <i>O. spinipes</i> gene ID | Predicted function    | $\Delta t$ [days] | Treatment group (RT-qPCR) sample size | Control group (RT-qPCR) sample size |
|-------------------|----------------------------|-----------------------|-------------------|---------------------------------------|-------------------------------------|
| GB40659           | g14708                     | fatty acid desaturase | 2                 | 7 (NA)                                | 6 (NA)                              |
| GB42218           | g14712_18                  | fatty acid desaturase | 4                 | 12 (12)                               | 13 (11)                             |
| GB48195           | g14710                     | fatty acid desaturase | 3                 | 11 (8)                                | 8 (7)                               |
| GB51238           | g14712_38                  | fatty acid desaturase | 4                 | 6 (6)                                 | 8 (7)                               |
| GB51247           | g7616                      | fatty acid elongase   | 5                 | 10 (8)                                | 6 (6)                               |
| GB51250           | g7615                      | fatty acid elongase   | 3                 | 7 (7)                                 | 8 (7)                               |
| GB53695           | g2290                      | fatty amid hydrolase  | 4-5*              | 10-7* (9)                             | 6 (6)                               |
| GB54397           | g7610                      | fatty acid elongase   | 2                 | 8 (NA)                                | 9 (NA)                              |
| GB54404           | g7617                      | fatty acid elongase   | 4                 | 7 (7)                                 | 11 (8)                              |

394 \* We used both samples collected 4 days (10 bees) and 5 days (7 bees) after injection.

395

396 **Supplementary Table 11.** Oligonucleotide primers used to amplify target gene  
 397 nucleotide stretches in the honey bee, required for *in situ* hybridization probe design and  
 398 dsRNA synthesis.

| Honey<br>beegene ID | <i>O. spinipes</i><br>gene ID | Forward oligonucleotide<br>primer (5' → 3') | T <sub>m</sub><br>(°C) | Reverse oligonucleotide<br>primer (5' → 3') | T <sub>m</sub><br>(°C) |
|---------------------|-------------------------------|---------------------------------------------|------------------------|---------------------------------------------|------------------------|
| GB40659             | g14708                        | CGACTGTGGGCGCATAAAAG                        | 60                     | TCACCTCCTGTTGTACGGT                         | 60                     |
| GB40681             | g7008                         | TGGTCCAGTGAAGATAGCTCATAC                    | 64                     | TTCCATCGTATTCCCAACTGT                       | 60                     |
| GB42218             | g14712_1                      | CTCCGAAAGCAAAGAGGGAC                        | 60                     | ACTGACGCAGATCCGCATAAC                       | 61                     |
| GB44756             | g283                          | GTGACGCAAAGGACTTATTTGG                      | 61                     | CTTACGCTTTACAATTACCTCTTGA                   | 61                     |
| GB46038             | g6537                         | CTCGCTGATGAACGAACGAGA                       | 61                     | CAATGCGGCCAAACCGTAAT                        | 58                     |
| GB48195             | g14710                        | TGGCATTTC AAGATGCAGCAA                      | 57                     | CCTTATCACCCCAACCCAC                         | 63                     |
| GB49380             | g7842                         | GTTAGATGTGCCGCTGTTTCG                       | 60                     | TGCTGCCAGGTGATTGGATT                        | 60                     |
| GB50627             | g2413                         | TGGTCTCGGTTTGTCTCCG                         | 60                     | TGTAGATTTCCGACGATCTGCT                      | 59                     |
| GB51236             | g14712_2                      | TCTTCAAACAACCGCTTTCCAA                      | 58                     | ATGCCATCCCTCACCACATC                        | 60                     |
| GB51238             | g14712_3                      | ATTATGCCATCCCTCGCCGT                        | 60                     | TGCGGATCCTCATAATTCCCG                       | 61                     |
| GC51247             | g7616                         | ACGAGTACTTGATGAGTGGCT                       | 59                     | AGCGAGCTTTTTCTCCGTGT                        | 58                     |
| GB51250             | g7615                         | TCACACCAGGCGGTCATTC                         | 59                     | GCATGATCGGGTCACTCGG                         | 62                     |
| GB52087             | g1571                         | AAGCAGAGAATGTAGCTGAAGT                      | 58                     | CGAAGACCTCTCACTCCTTGA                       | 61                     |
| GB52590             | g3158                         | CGAAAAGTTACAAGCGAACGGT                      | 60                     | CTCGATGCACTTGACACCCT                        | 60                     |
| GB52820             | g3059                         | AGGAAATTAAGATGTCCCGGAA                      | 61                     | ACAGCCACAAGAAACCTTGG                        | 59                     |
| GB53412             | g907                          | CGGTTTTTCAGGACGTTATCCT                      | 60                     | CGTACACTCTGCGTGCATCT                        | 60                     |
| GB53695             | g2290                         | GGTCAACTCTTAACATCCCCAGT                     | 63                     | TGTAGGCCACCAACAATCTGTAT                     | 61                     |
| GB54302             | g7621                         | GCGCTCAGGGTCGCTAGA                          | 61                     | TGTCTTTGCTATCTCGGTCTCC                      | 62                     |
| GB54396             | g7611                         | AAAGGCCATCCAATAACGAAAGA                     | 59                     | CCGATCGAAGCCAGCATGTA                        | 61                     |
| GB54397             | g7610                         | TCCTCGCGCAATAGAGATAACC                      | 62                     | CGCCAAACAATGATGGACGG                        | 60                     |
| GB54399             | g7609                         | ACCTGGATTCAACTGGTGCAA                       | 59                     | GCCACTTGACGAACCTCCTT                        | 60                     |
| GB54401             | g7620                         | GTCGGTGAACAGAAATGGCA                        | 59                     | TTCCGGTCCCATAGCGGATA                        | 60                     |
| GB54404             | g7617                         | CGTTAAGTTCACTCCTGGTGG                       | 61                     | CGGTTCCCTAAGCCACTGTC                        | 63                     |
| GB55040             | g858                          | TTAGACAGTAGGTTGCCGCC                        | 60                     | CCACATACCACCTGGGACAA                        | 59                     |
| GFP                 | GFP                           | GGAGAAGAACTTTTCACTGG                        | 59                     | ATTCTTTGTTTGTCTGCC                          | 58                     |

399

400 **Supplementary Table 12.** Oligonucleotide primer sequences used to quantify the  
 401 expression of target genes via quantitative reverse-transcription real-time PCR in RNAi  
 402 experiments.

| Honey bee gene ID | Forward oligonucleotide primer | T <sub>m</sub> (°C) | Reverse oligonucleotide primer | T <sub>m</sub> (°C) |
|-------------------|--------------------------------|---------------------|--------------------------------|---------------------|
| GB40659           | CCGGCCAGGTTACGGATAAT           | 60                  | TCCTGTGGTCCCGTATCCAT           | 60                  |
| GB42218           | ATGGGATTTGCTGGTTCGAT           | 56                  | CTCTGTGGTCCCTTACCCAT           | 60                  |
| GB48195           | GCCGCTGTGTATGGATTGTATC         | 62                  | GCTGTAATCCCAATCCAGTGC          | 62                  |
| GB49975           | TGCAATGTTGACAGGTTGGT           | 56                  | CTCTGTCCCTTTTCTAGCTGC          | 62                  |
| GB51238           | GGATTAACGGAACGAAGGCA           | 58                  | TGTGATTCTGGTAAGAGGTTGTT        | 59                  |
| GB51247           | AAATCAGATCCCAGAGTGAACCA        | 61                  | ACGTGGAGAATAGCGTTTGGA          | 59                  |
| GB51250           | CAAATGGTGTTCAGCGTGG            | 61                  | ACAAAGAAGATCGTGTCCATGAAT       | 60                  |
| GB53695           | GGCTATCCCTCTAGCAACCAC          | 63                  | ACCACCAGAAGATCCACCAA           | 58                  |
| GB54397           | CGATCCTCGCGCAATAGAGAT          | 61                  | CGGAGGACAAAGAAGACCGTA          | 61                  |
| GB54404           | TAGCAGGATGGGGAGGTCAA           | 60                  | ACCACCAACAACCTTCTGCC           | 60                  |

403

404

405 **Supplementary Figures**

406 **Supplementary Figure 1. Differences in the relative abundance of specific alkenes**  
 407 **and of alkadienes in cuticular hydrocarbon profiles of *Odynerus spinipes* females.**

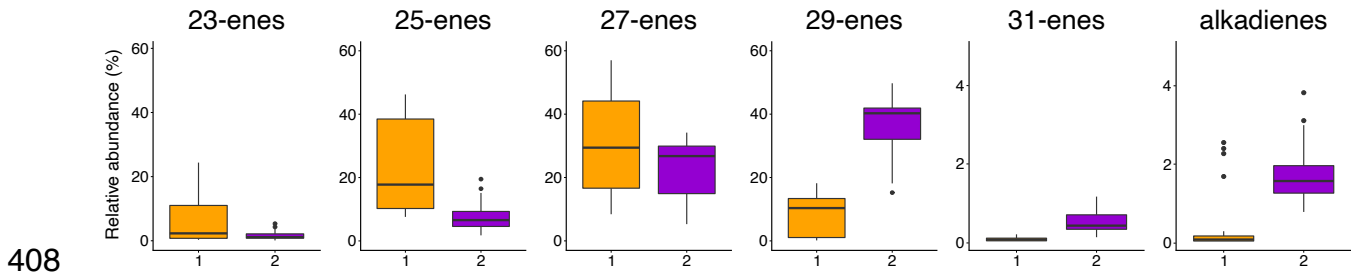

409 Box plots of the relative abundances of specific alkenes and of alkadienes in females  
 410 expressing either chemotype 1 (orange) or chemotype 2 (purple).

411

412 **Supplementary Figure 2. Gene tree of fatty acid synthases from 37 species of**  
 413 **Euarthropoda showing copy numbers and involvement of genes in CHC**  
 414 **biosynthesis.**

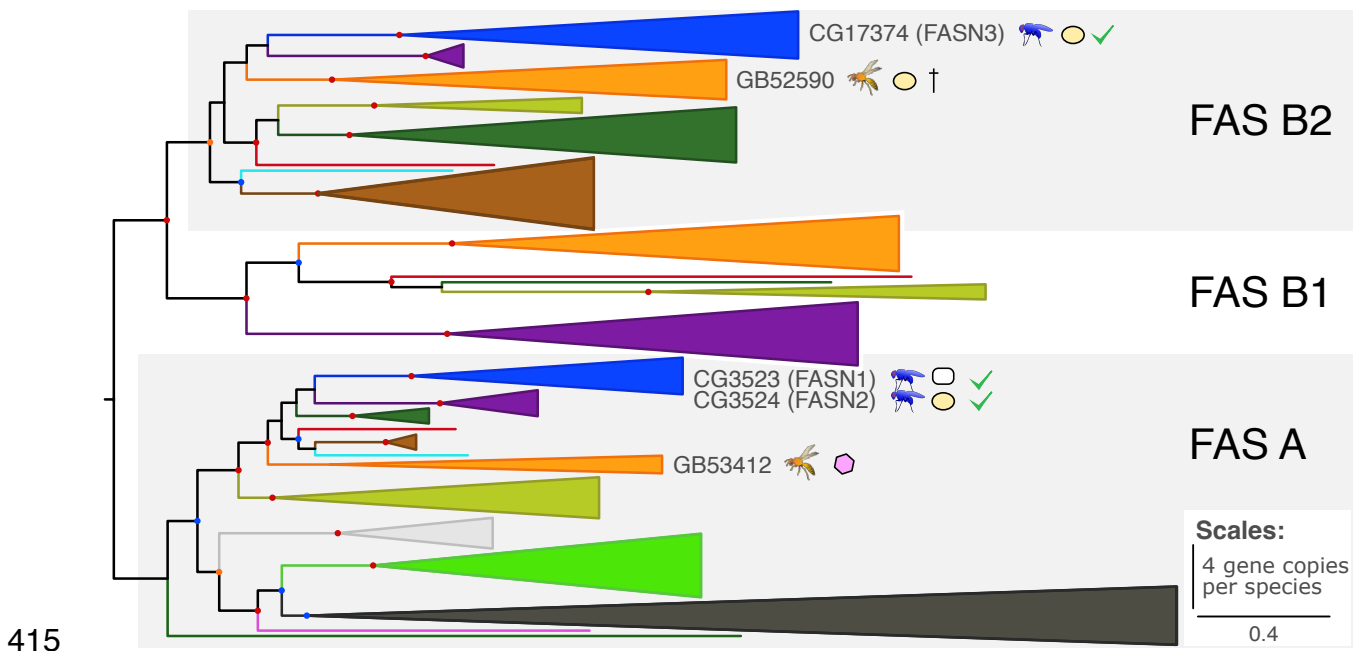

416 Color coding and symbols are as in the legend of **Figure 2**, the cross indicates the target  
 417 gene which knockdown caused a premature death of the treated bees.

418

419 **Supplementary Figure 3. Gene tree of fatty acyl-CoA reductases from 37 species**  
 420 **of Euarthropoda showing copy numbers and involvement of genes in CHC**  
 421 **biosynthesis.**

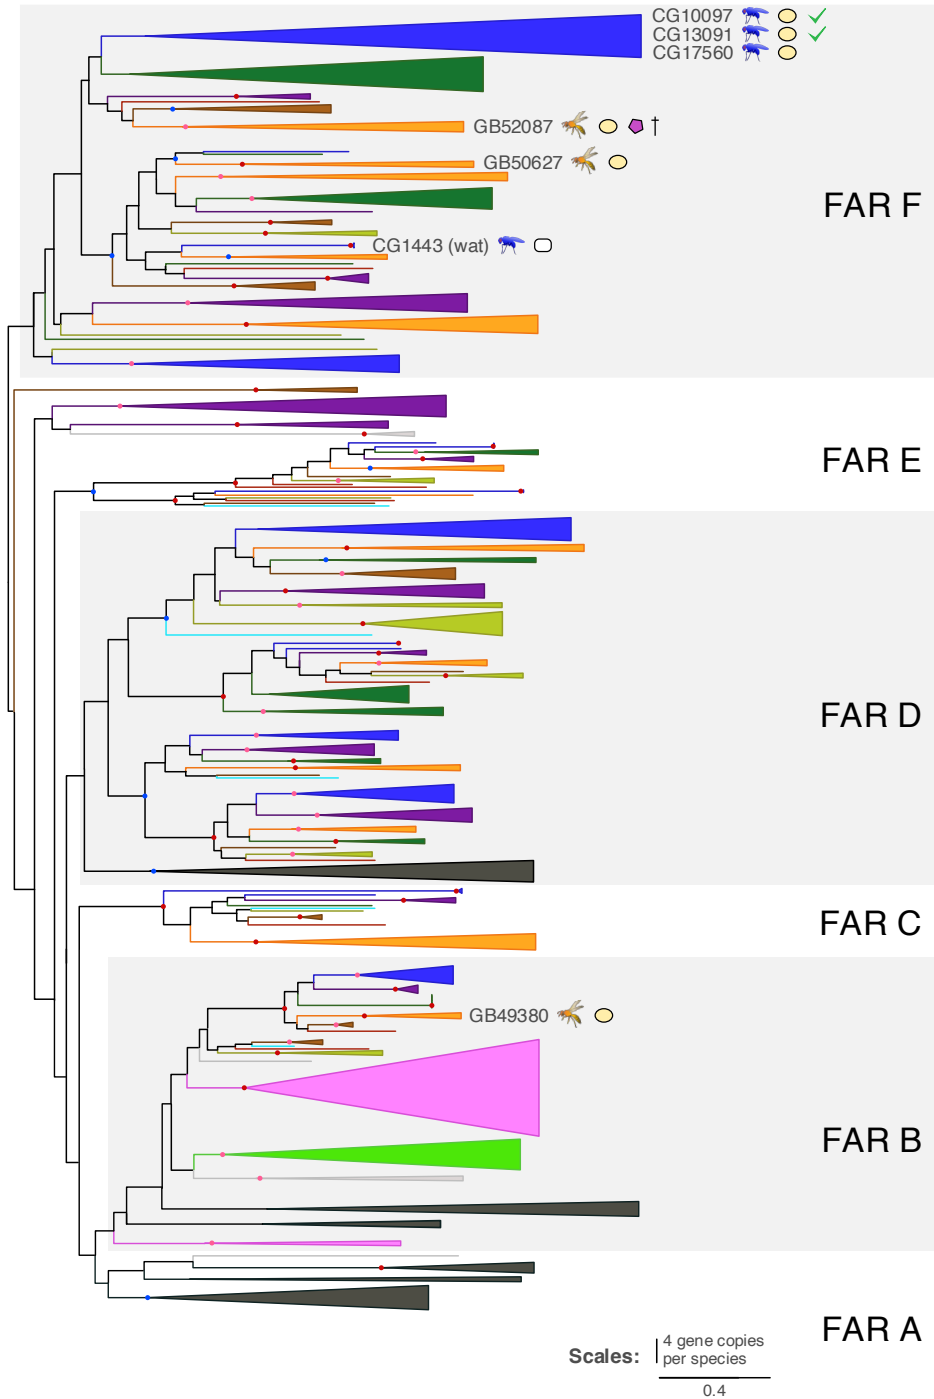

422

423 Color coding and symbols are as in the legend of **Figure 2**, the cross indicates the target  
 424 gene which knockdown caused a premature death of the treated bees.

425 **Supplementary Figure 4. Composition photomicrographs of worker honey bee**  
 426 **(*Apis mellifera*) fat body cells stained with control probes (sense RNA) of the**  
 427 **candidate genes.**

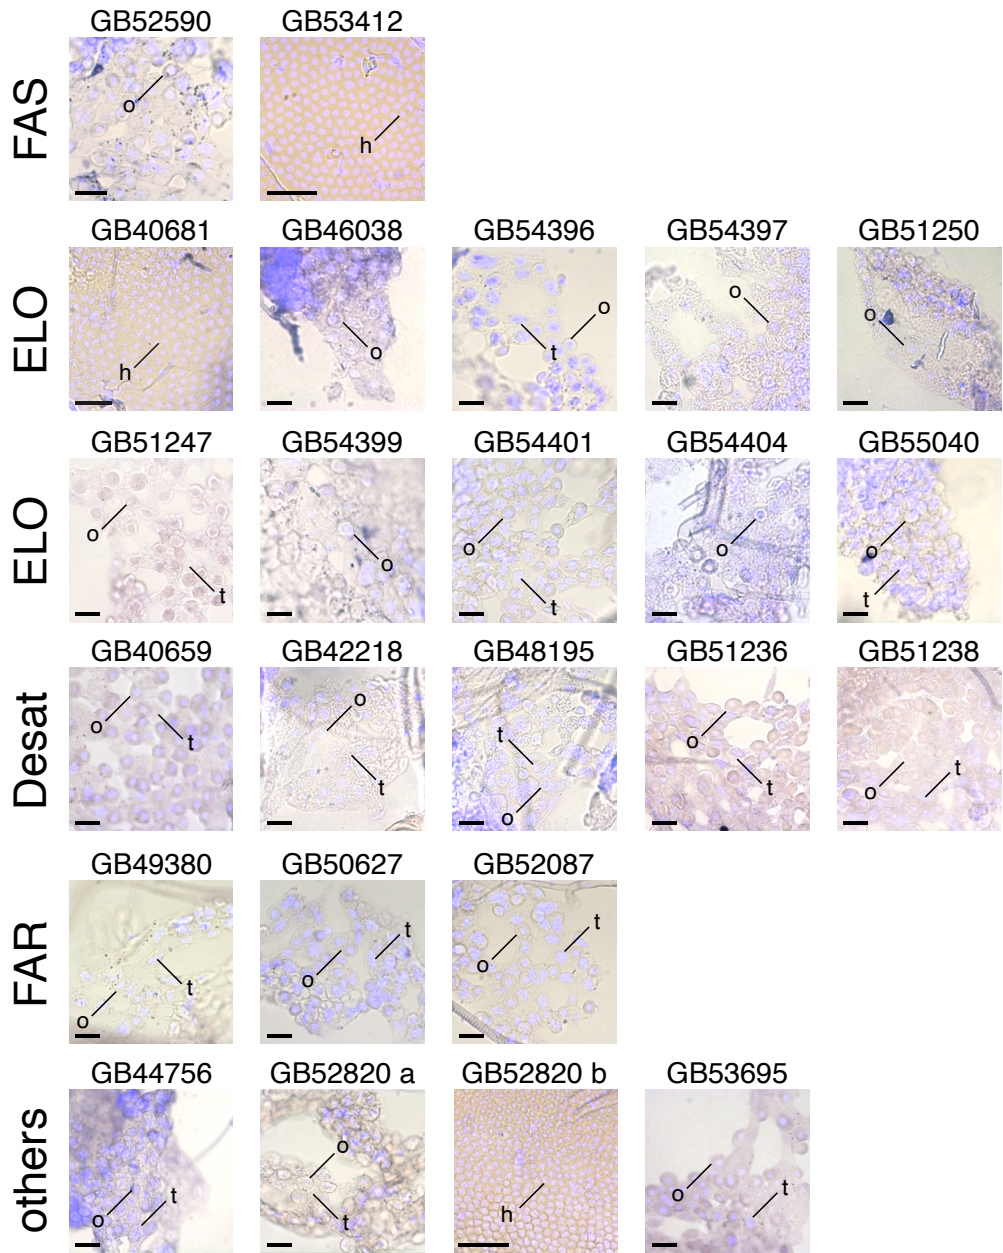

428

429 The cells are stained with DAPI (in light blue) and with the sense RNA probes of fatty  
 430 acid synthases (FAS), elongases (ELO), desaturases (Desat), fatty acid reductases  
 431 (FAR), and other candidate genes (others) in three types of cells: hexagonal cells (h),  
 432 oenocytes (o), and trophocytes (t). DAPI was used to counterstain the nuclei of cells.  
 433 Scale bar: 50  $\mu$ m.

434 **Supplementary Figure 5. Effects of RNAi-mediated knockdown of the fatty acid**  
 435 **desaturase *GB51236* in worker honey bees (*Apis mellifera*) 2–5 days after dsRNA**  
 436 **treatment.**

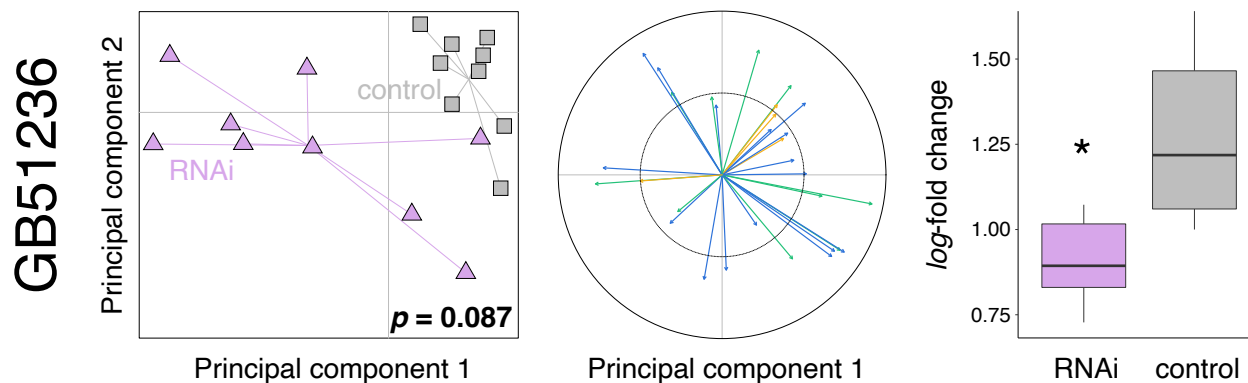

437 The first two columns show score plots and correlation circle plots from a powered  
 438 partial least squares discriminant analysis (PPLS-DA) of cuticular hydrocarbon (CHC)  
 439 profile data of target gene-treated (in purple) and of control bees (in grey, injected with  
 440 dsRNA targeting GFP). *P*-values indicate the statistical probability of group differences  
 441 representing random variation after Benjamini-Hochberg correction for multiple (N = 10)  
 442 testing. The correlation circle plots indicate how many CHCs of a given compound class  
 443 (i.e., alkanes [green], alkenes/alkadienes [blue], methyl-branched alkanes [yellow])  
 444 correlate with the first two principal components. Box plots in the third column show  
 445 gene expression levels ( $\log_2$ -fold change) of the target genes in target gene-treated (in  
 446 purple) and in control bees (in grey). Asterisks indicate the statistical significance of  
 447 expression differences between target gene-treated and control bees after applying  
 448 Benjamini-Hochberg correction for multiple testing (N = 9; Welch's t-test/Wilcoxon  
 449 signed-rank test;  $p \leq 0.05$  [\*],  $p \leq 0.01$  [\*\*]).

451

452 **Supplementary Figure 6. Correlation circle plots from a powered partial least**  
 453 **squares discriminant analysis (PPLS-DA) of the cuticular hydrocarbon (CHC)**  
 454 **profile data of target gene-treated bees (fatty acid elongases and fatty acid amide**  
 455 **hydrolase) and of control bees.**

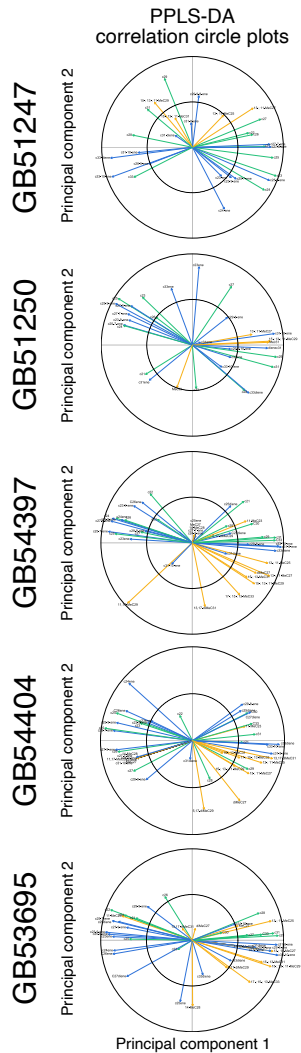

456

457 The correlation circle plots indicate how many CHCs of a given compound class (i.e.,  
 458 alkanes [green], alkenes/alkadienes [blue], methyl-branched alkanes [yellow]) correlate  
 459 with the first two principal components separating the CHC profiles of RNAi-treated bees  
 460 of the control bees in case of knockdown of four fatty acid elongases (*GB51247*,  
 461 *GB51250*, *GB54397*, *GB54404*) and of one fatty acid amide hydrolase (*GB53695*) in  
 462 worker honey bees (*Apis mellifera*) 2–5 days after dsRNA treatment. The specific  
 463 identity of the CHCs is indicated at the tip of the arrows with established acronyms. The  
 464 provided information complements that given in **Figure 5**.



465 **Supplementary Figure 7. Correlation circle plots from a powered partial least**  
 466 **squares discriminant analysis (PPLS-DA) of the cuticular hydrocarbon (CHC)**  
 467 **profile data of target gene-treated bees (fatty acid desaturases) and of control**  
 468 **bees.**

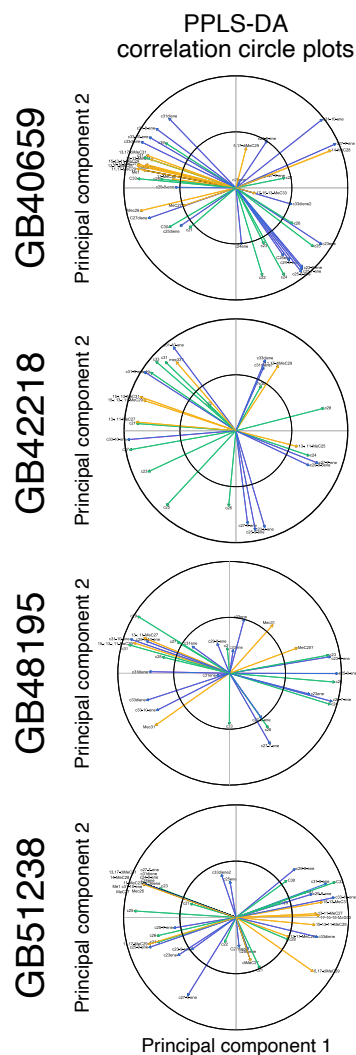

469

470 The correlation circle plots indicate how many CHCs of a given compound class (i.e.,  
 471 alkanes [green], alkenes/alkadienes [blue], methyl-branched alkanes [yellow]) correlate  
 472 with the first two principal components separating the CHC profiles of RNAi-treated bees  
 473 of the control bees in case of knockdown of four fatty acid desaturases (*GB40659*,  
 474 *GB42218*, *GB48195*, *GB51238*) in worker honey bees (*Apis mellifera*) 2–5 days after  
 475 dsRNA treatment. The specific identity of the CHCs is indicated at the tip of the arrows  
 476 with established acronyms. The provided information complements that given in **Figure**  
 477 **6.**

478 **Supplementary Figure 8. Gene tree of fatty acid amide hydrolases (FAAH) from 37**  
 479 **species of Euarthropoda showing copy numbers and involvement of genes in**  
 480 **CHC biosynthesis.**

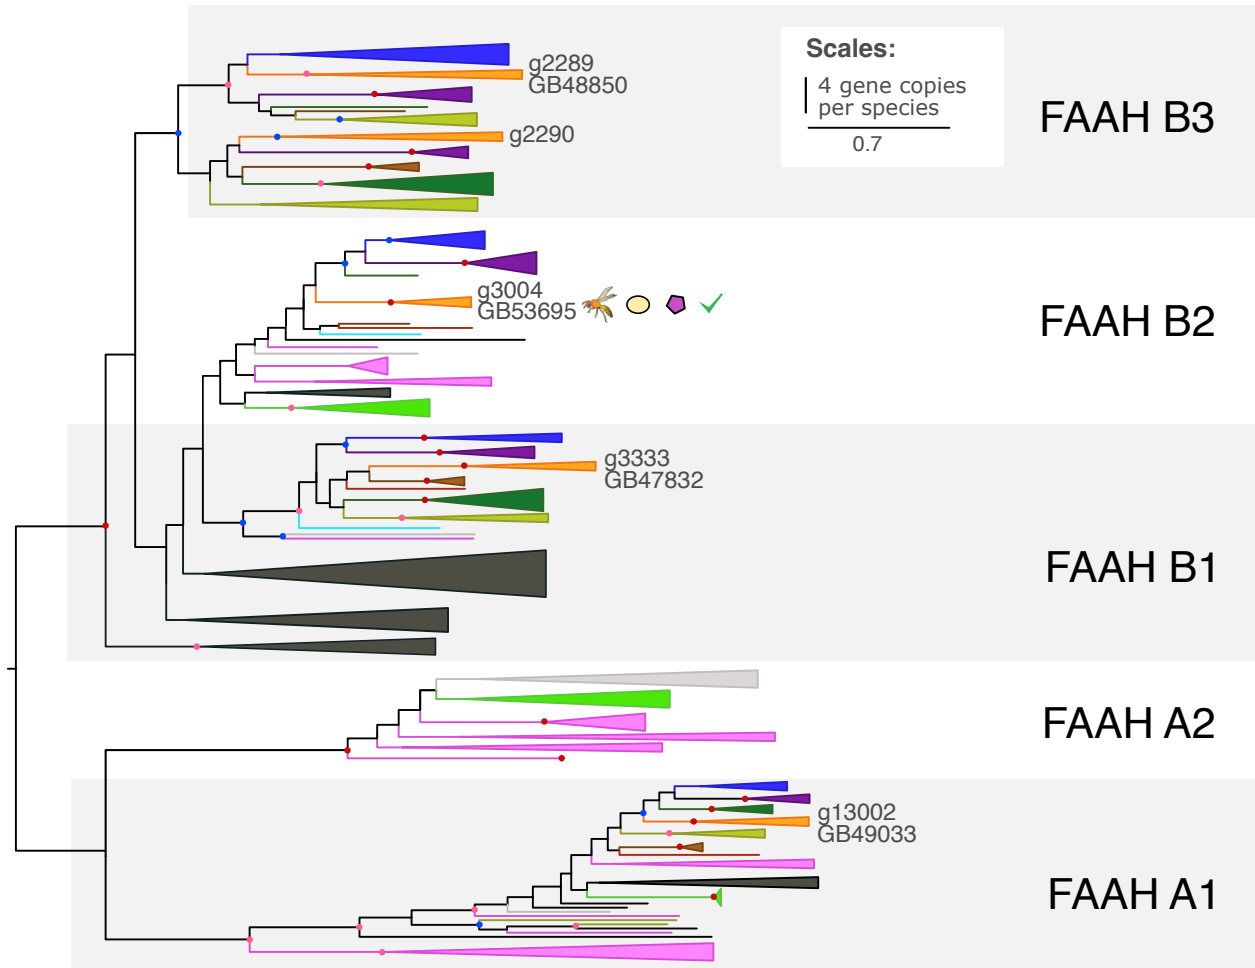

481

482 Color coding and symbols are as in the legend of **Figure 2**.

483

484 **Supplementary Figure 9. Number of genes (y axis) found in the 37 species of**  
 485 **Euarthropoda (x axis) for the five studied gene families: ELO (fatty acid elongase),**  
 486 **Desat (fatty acid desaturase), FAR (fatty acyl-CoA reductase), FAS (fatty acid**  
 487 **synthase), FAAH (fatty acid amide hydrolase).**

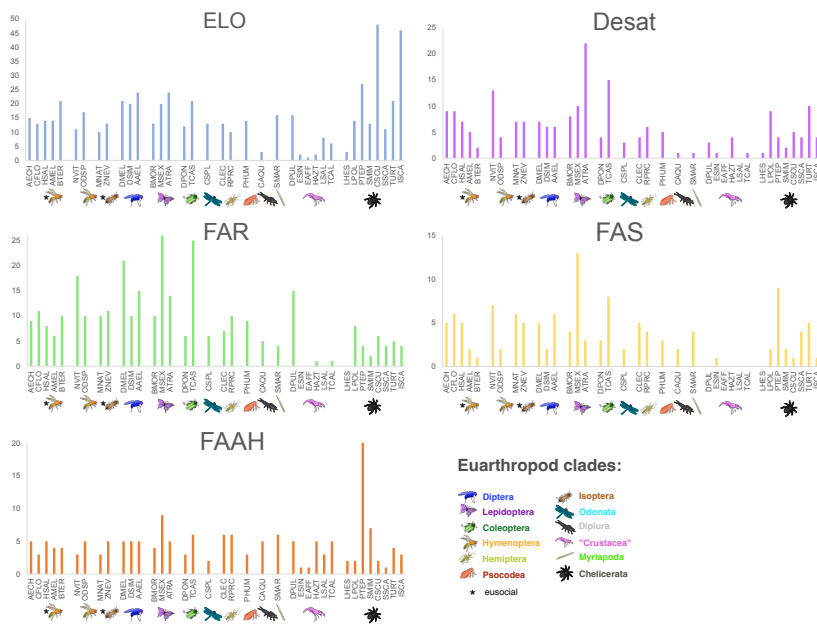

488

489 The 37 species represented are the following: eusocial Hymenoptera: AECH  
 490 (*Acromyrmex echinator*), CFLO (*Camponotus floridanus*), HSAL(*Harpegnathos*  
 491 *saltator*), AMEL (*Apis mellifera*), BTER (*Bombus terrestris*), NVIT (*Nasonia vitripennis*);  
 492 solitary hymenoptera: ODSP (*Odynerus spinipes*); Isoptera: MNAT (*Macrotermes*  
 493 *natalensis*), ZNEV (*Zootermopsis nevadensis*); Diptera: DMEL (*Drosophila*  
 494 *melanogaster*), DSIM (*Drosophila simulans*), AAEL (*Aedes aegypti*); Lepidoptera: BMOR  
 495 (*Bombyx mori*), MSEX (*Manduca sexta*), ATRA (*Amyelois transitella*); Coleoptera:  
 496 DPON (*Dendroctonus ponderosae*), TCAS (*Tribolium castaneum*); Odonata: CSPL  
 497 (*Calopteryx splendens*); Hemiptera: CLEC (*Cimex lectularius*), RPRC (*Rhodnius*  
 498 *prolixus*); Psocodea: PHUM (*Pediculus humanus*); Diplura: CAQU (*Catajapyx*  
 499 *aquilonaris*); Myriapoda: SMAR (*Strigamia maritima*); "Crustacea": DPUL (*Daphnia*  
 500 *pulex*), ESIN (*Eriocheir sinensis*), EAFF (*Eurytemora affinis*), HAZT (*Hyalella azteca*),  
 501 LSAL (*Lepeophtheirus salmonis*), TCAL (*Tigriopus californicus*); Chelicerata: LHES  
 502 (*Latrodectus hesperus*), LPOL (*Limulus polyphemus*), PTEP (*Parasteatoda*  
 503 *tepidariorum*), SMIM (*Stegodyphus mimosarum*), CSCU (*Centruroides sculpturatus*),  
 504 SSCA (*Sarcoptes scabiei*), TURT (*Tetranychus urticae*), ISCA (*Ixodes scapularis*).
